# Supplementary material for: pH/GSH dual-responsive supramolecular nanomedicine for hypoxia-activated combination therapy
Source: Royal Society of Chemistry journal article supplement (doi:10.1039/d3bm00519d), 2023-01-01
Supplement: d3bm00519d1.pdf [file d3bm00519d1.pdf]

## **pH/GSH dual-responsive supramolecular nanomedicine for hypoxia-activated combination therapy**

Chang Du,<sup>‡a</sup> Chenwei Wang,<sup>‡c</sup> Shu-Heng Jiang,<sup>a</sup> Xiangqin Zheng,<sup>b</sup> Zelong Li,<sup>b</sup>  
Yong Yao,<sup>c</sup> Yue Ding<sup>\*c</sup>, Tingting Chen<sup>\*c</sup> and Huan Yi<sup>\*b</sup>

- a. State Key Laboratory of Oncogenes and Related Genes, Shanghai Cancer Institute, Ren Ji Hospital, School of Medicine, Shanghai Jiao Tong University, Shanghai, 200240, China.
- b. Department of Gynecology Oncology, Fujian Provincial Maternity and Children's Hospital, Fujian Provincial Key Gynecology Clinical Specialty, The Affiliated Hospital of Fujian Medical University, Zhangzhou, Fujian, China.
- c. School of Chemistry and Chemical Engineering, Nantong University, Nantong 226019, P. R. China.

\*Corresponding author: yueding@ntu.edu.cn (Yue Ding), ttchen1980@126.com (Tingting Chen), yihuangsrk@126.com (Huan Yi)

## Materials

Anhydrous dimethylformamide (DMF, 99.8%, J&K), glucose oxidase (GOD, 65 U/mg, Sigma-Aldrich), tirapazamine (TPZ, 98%, Macklin), trifluoroacetic acid (TFA, 99%, Macklin), amine-modified  $\beta$ -CD (Sigma-Aldrich) was used as received. S-(onitrobenzyl)-L-cysteine-N-carboxyanhydride ( $L$ -NBC-NCA) monomer were synthesized following the procedure described previously [1]

### Synthesis of polymer PEG-Fc

The ferrocene-terminal-modified PEG (PEG-Fc) was synthesized by conjugating ferrocene with PEG-NH<sub>2</sub> through a weakly acidic tumor microenvironment responsive benzoic-imine bond. The 10 mL anhydrous ethanol of PEG-NH<sub>2</sub> (100 mg, 0.019 mmol) was added into 20 mL DMSO solution of formyl-ferrocen (4.01 mg, 0.019 mmol) with vigorous stirring for 12 h. The resulting solution was purified by dialysis against distilled water, followed by freeze-drying to receive production PEG-Fc (76.3 mg, yield: 77.3%). The <sup>1</sup>H NMR spectrum of PEG-Fc was shown in **Fig. S2**.

### Synthesis of polymer CD-PNBC

The polypeptide CD-PPC was prepared by ring-opening polymerization (ROP). The  $\beta$ -cyclodextrin-terminal-modified poly(ethylene oxide) (CD-PNBC) was synthesized by the ROP of  $L$ -NBC-NCA using amine-modified  $\beta$ -cyclodextrin (CD-NH<sub>2</sub>) as an initiator in DMF solution at room temperature. Briefly,  $L$ -NBC-NCA (141.1 mg, 0.5 mmol) was dissolved in 2.0 mL DMF under N<sub>2</sub> atmosphere, and then a degassed solution of Py-NH<sub>2</sub> (22.7 mg, 0.02 mmol) in DMF was added. The resulting solution was stirred vigorously at room temperature for 48 h and then precipitated dropwise into a large excess of diethyl ether (16 mL). The white precipitate was centrifuged and dried

under vacuum at 35 °C to give 98.9 mg of CD-PNBC (yield: 83.9%). The <sup>1</sup>H NMR spectrum of PPC was shown in **Fig. S3**.

### **Synthesis of polymer CD-PC**

The CD-PNBC solution (0.5 mg/mL) in 100 mL of DMF/CH<sub>3</sub>CN ( $v : v = 4 : 1$ ) was irradiated under a high pressure mercury lamp ( $\lambda = 365$  nm, 150 W) for 12 h to achieve complete photocleavage of NB groups. The solution was concentrated to about 2 mL and then precipitated dropwise into a large excess of ether (16 mL). The brown precipitate was centrifuged and dried under vacuum at 35 °C to give the intermediate product (23.2 mg, 85.7% yield). <sup>1</sup>H NMR spectrum of CD-PC was shown in **Fig. S4**.

### **Fabrication of core cross-linked supramolecular nanomedicine PFC/GOD-TPZ**

Generally, PEG-Fc (10 mg), CD-PC (6.03 mg), TPZ (6 mg) and GOD (3.5 mg) were dissolved in DMF (1 mL), and then stirred for 6 h in the dark. Thereafter, distilled water was added into the above solution under vigorous stirring overnight. Then, the mixture solution was oxidized with 0.1 mM H<sub>2</sub>O<sub>2</sub> at 37 °C for 4 h to produce the oxidized nanoparticle solution, and then transferred into dialysis tube (MWCO 3500 Da) by dialysis against distilled water for 24 h to give the supramolecular polypeptide nanomedicine PFC/GOD-TPZ. Similarly, the PFC/GOD and PFC/TPZ were fabricated without TPZ and GOD, respectively.

### ***In vitro* drug release**

The solution of PFC/GOD-TPZ (2.0 mL, 0.5 mg/mL) was placed into dialysis tube (MWCO 3500 Da), followed by dialysis against PBS (20 mL, pH 6.5+GSH, pH 6.5, pH 7.4+GSH or pH 7.4). At selected time intervals, the original dialysate was replaced

with fresh PBS. The collected dialysate was analyzed by UV-vis spectroscopy to calculate the amount of released TPZ.

### ***In vitro* cytotoxicity**

HeLa cells suspension in DMEM was placed in a 96-well plate at a density of  $1 \times 10^4$  cells/well (200  $\mu$ L) and incubated for 24 h. Subsequently, the medium in each well was replaced with fresh medium (pH 6.5 or 7.4) containing PFC/GOD, PFC/TPZ or PFC/GOD-TPZ with different concentrations. After 48 h incubation, the cytotoxicity was analyzed by using MTT assays. As for live/dead assay, the HeLa cells was stained by fluorescein diacetate and propidium iodide, and then imaged by fluorescent microscope.

### ***In vitro* cell internalization**

The cell internalization of PFC/TPZ or PFC/GOD-TPZ was investigated by confocal laser scanning microscope (CLSM). HeLa cells was seeded into 6-well tissue culture plate at a density of  $5.0 \times 10^5$  cells/well, and incubated for 24 h. Next, the fresh medium (pH 6.5 or 7.4) containing PFC/TPZ or PFC/GOD-TPZ with same drug concentration (5  $\mu$ g/mL TPZ equiv.) was added to each well for selected time with or without the 808 nm NIR irradiation (1.0 W/cm<sup>2</sup>, 5 min). Then, the medium containing drugs was removed, and the cells were washed with PBS, stained with Hoechst33342 for 15 min, and respectively imaged by CLSM for cell internalization.

### ***In vivo* pharmacokinetics analysis**

The pharmacokinetics analysis was performed using SD rats that were randomly divided into two groups (n = 4). The free TPZ and PFC/GOD-TPZ at equivalent TPZ

concentrations (8 mg/kg) and equivalent GOD concentrations (371 U/kg) were injected via the tail vein. The orbital vein blood (0.3 mL) was obtained at a predetermined time, harvested by centrifugation, and frozen at -20 °C. The TPZ level in blood was measured by fluorescence spectroscopy.

### ***In vivo* antitumor activity**

The HeLa tumor-bearing mice with a tumor volume (80 mm<sup>3</sup>) were spontaneously assigned into five groups (n = 4), and then intravenously injected at 0 day with PBS, PFC, PFC/GOD, PFC/ TPZ or PFC/GOD-TPZ at TPZ equivalent dose of 6 mg/kg and GOD dose of 278.3 U/kg. The tumor volume (V) is calculated according to the following equation:  $V = 1/2 \times \text{length} \times \text{width}^2$ . The tumor inhibitory rates (TIR) is calculated by the equation:  $\text{TIR} (\%) = 100 \times (\text{mean tumor volume of the PBS group} - \text{mean tumor volume of others}) / (\text{mean tumor volume of the PBS group})$ . At the end of the treatment, all tumors and major organs (heart, liver, spleens, lung, and kidneys) were dissected for histological examination by H&E staining, TUNEL and PCNA assays.

### **Statistical analysis**

The data was expressed as mean  $\pm$  standard deviations (S.D) using GraphPad Prism software 5.0. The two-tailed analysis of variance and the Student's t-test were used to determine statistical significance. A probability (P) value  $< 0.01$  was indicated to be significant, and  $P < 0.001$  was highly significant.

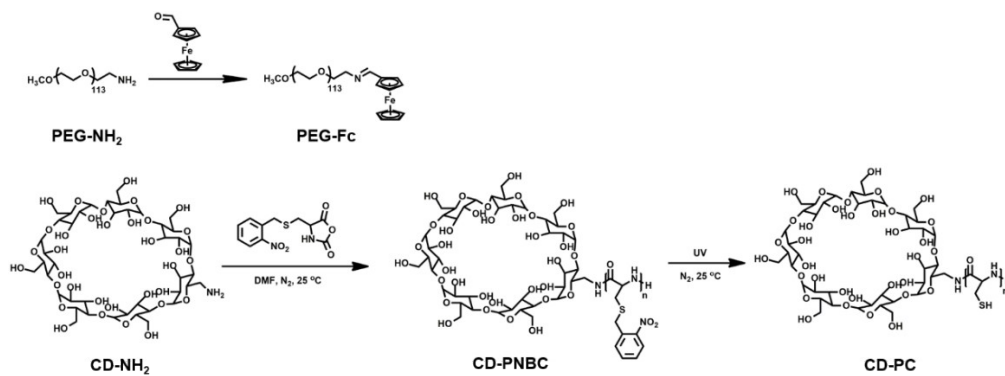

**Fig. S1** Synthesis of PEG-Fc and CD-PC.

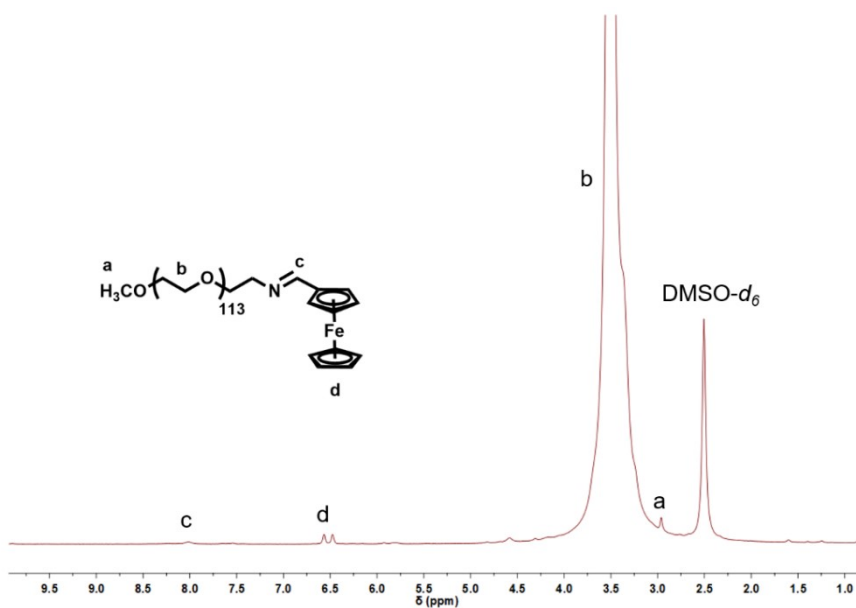

**Fig. S2** <sup>1</sup>H NMR spectra of PEG-Fc (DMSO-*d*<sub>6</sub>).

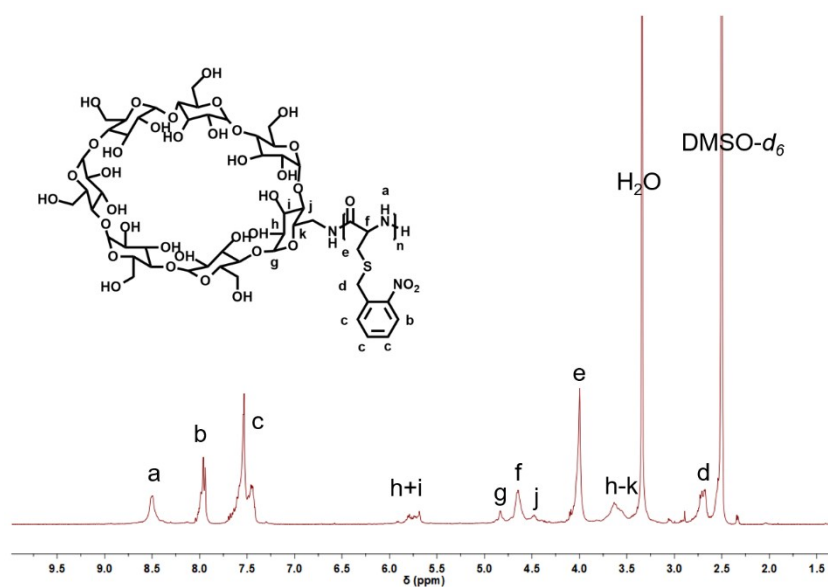

**Fig. S3** <sup>1</sup>H NMR spectra of CD-PNBC (DMSO-*d*<sub>6</sub>).

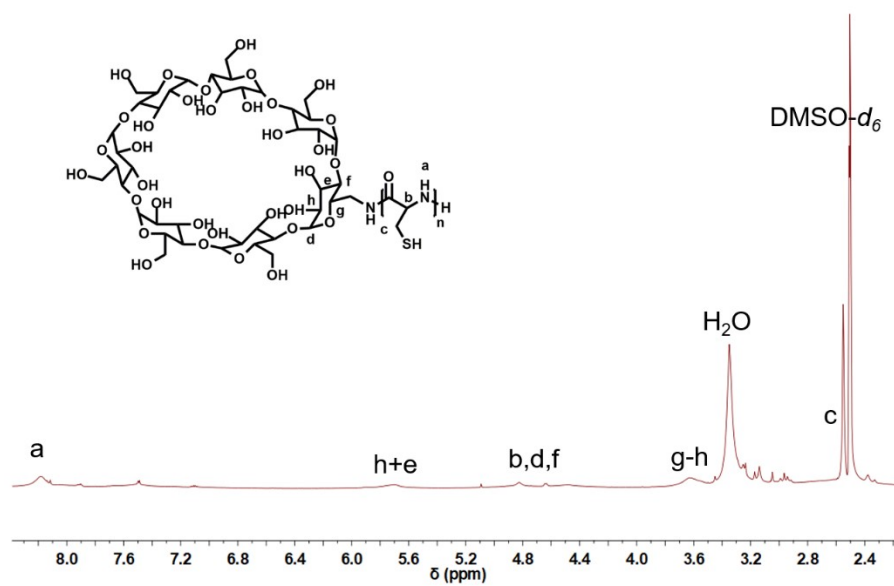

**Fig. S4** <sup>1</sup>H NMR spectra of CD-PC (DMSO-*d*<sub>6</sub>).

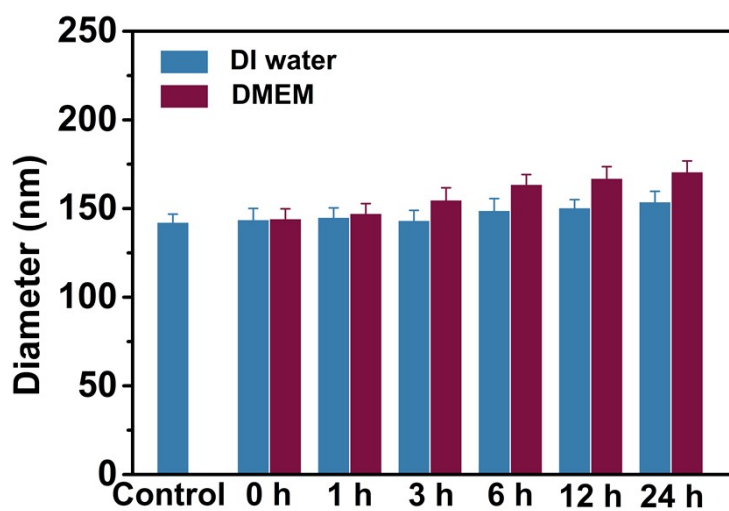

**Fig. S5** The dependence of hydrodynamic diameter on incubation time in DI water and DMEM for PFC/GOD-TPZ.

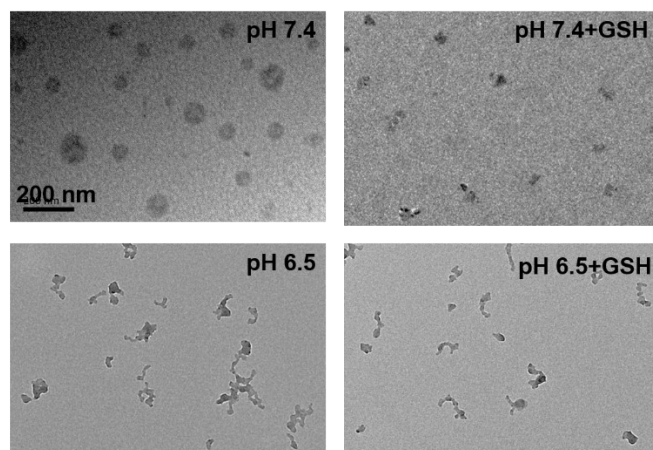

**Fig. S6** TEM images of PFC/GOD-TPZ incubated at different conditions.

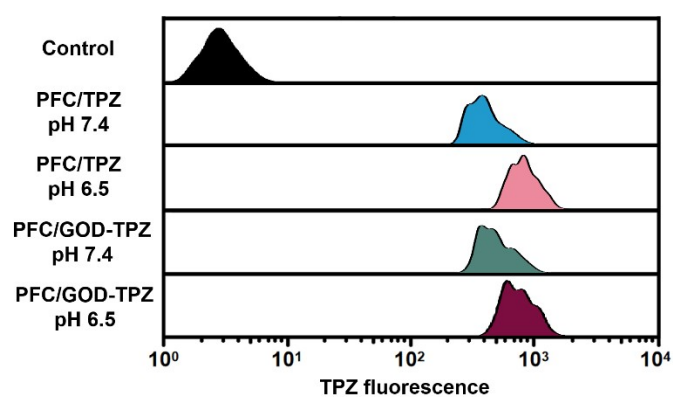

**Fig. S7** Flow cytometry histograms of PFC/TPZ and PFC/GOD-TPZ at pH 7.4 and 6.5.

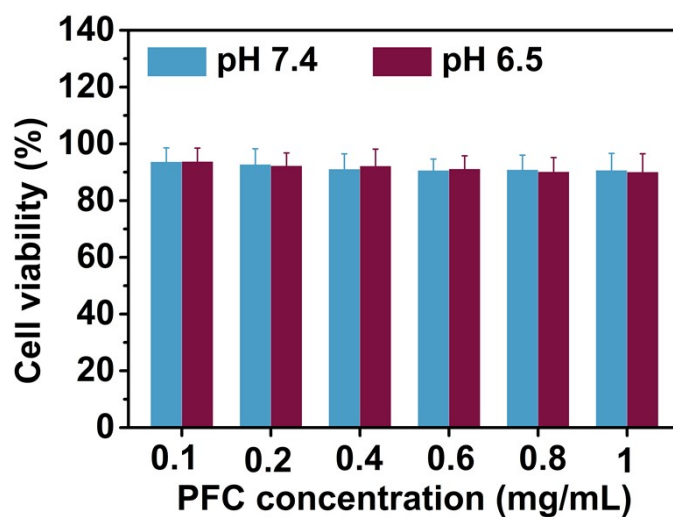

**Fig. S8** Cytotoxicity of PFC incubated HeLa cells at pH 7.4 and 6.5.



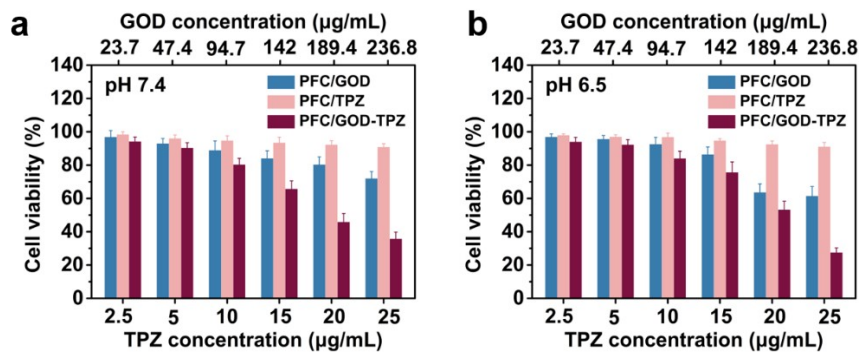

**Fig. S9** Cytotoxicity of different samples incubated L929 cells at pH 7.4 (a) and 6.5 (b).

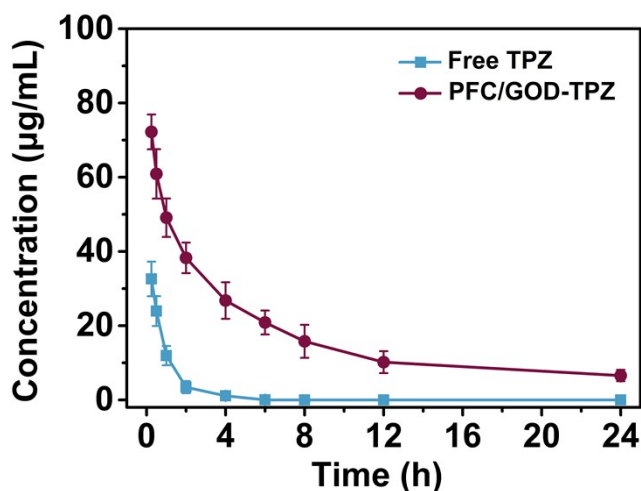

**Fig. S10** Representative plasma concentration-time profiles of free TPZ and PFC/GOD-TPZ.

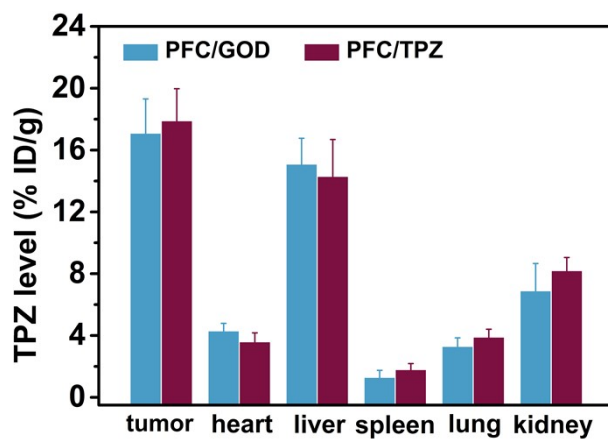

**Fig. S11** *Ex vivo* fluorescence quantification of PFC/GOD PFC/TPZ in tumor tissue and major organs at 12 h of post-injection.

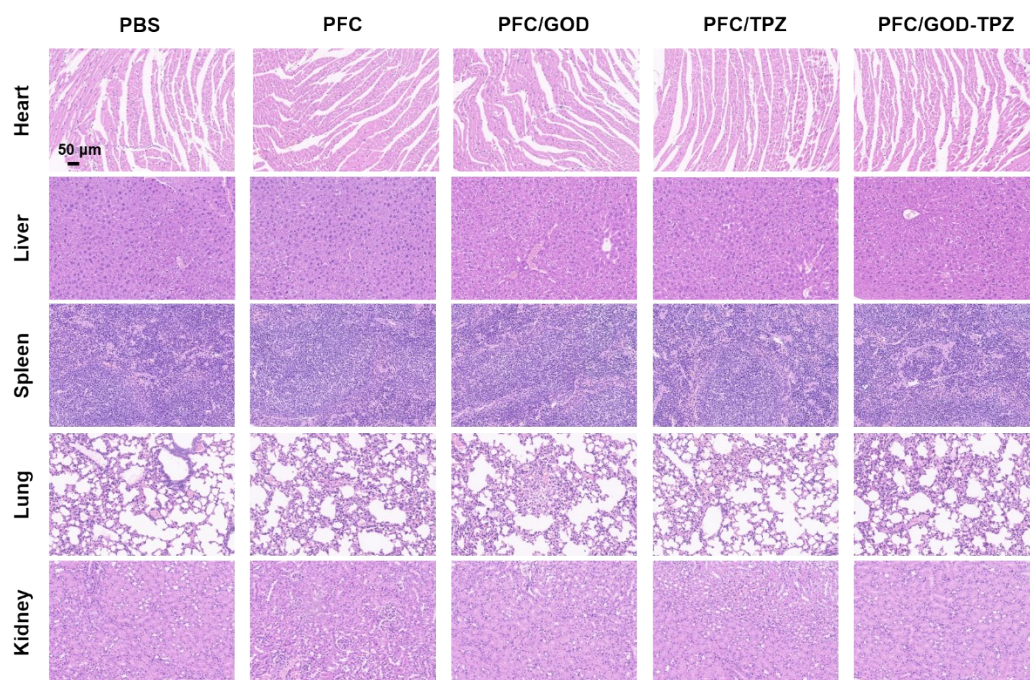

**Fig. S12** H&E-stained tissue sections from the major organs (heart, liver, spleen, lung, and kidney) dissected after 18 days treatments (magnification  $\times 400$ ).

### Supplementary References

- [1] Y. Ding, C. Du, J. Qian, et al., *Polym. Chem.* 9 (2018) 3488-3498.
